# Supplementary material for: Edible Chitosan Films and Their Nanosized Counterparts Exhibit Antimicrobial Activity and Enhanced Mechanical and Barrier Properties
Source: PubMed Central journal article supplement (PMC6337635; doi:10.3390/molecules24010127), 2018-12-31
Supplement: molecules-24-00127-s001.pdf [file molecules-24-00127-s001.pdf]

Table S1: Tensile strength (TS) properties of chitosan bio-based films prepared from non-sonicated chitosan (NS) and nano-sized chitosan sonicated at increasing times – 5 min( $S_{5\text{ min}}$ ) – and NS/S blends.

| c                      | Mixing ratio | TS / MPa  |
|------------------------|--------------|-----------|
| NS                     | -            | 82.2±1.0  |
| NS/ $S_{5\text{ min}}$ | 7:3          | 61.7±3.7  |
|                        | 1:1          | 64.2±5.3  |
|                        | 3:7          | 100.6±7.4 |
| $S_{5\text{ min}}$     | -            | 56.0±6.7  |

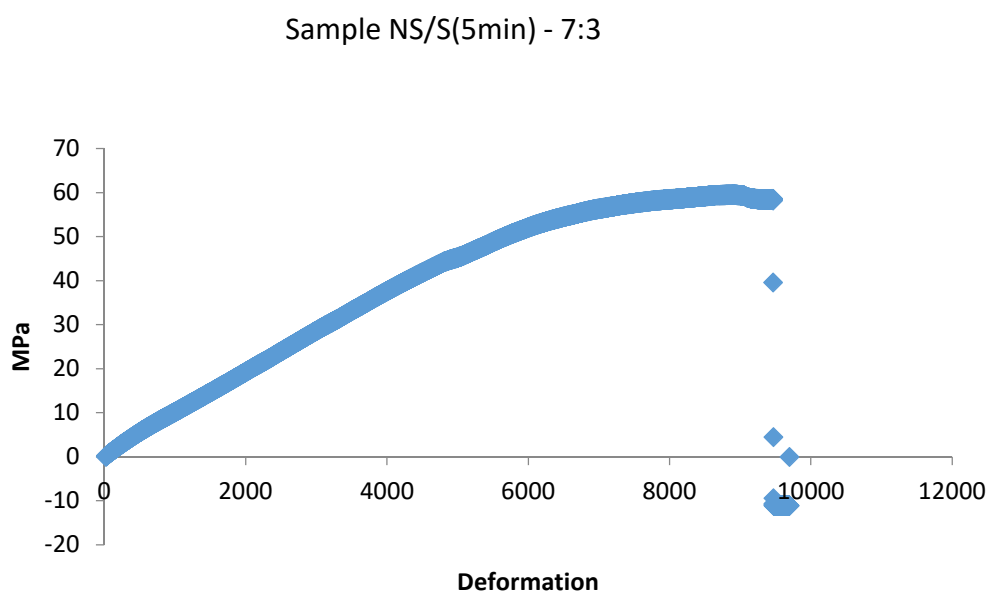

Figure S1: Stress curve for the sample Sample NS/S(5min)—7:3.
